# Supplementary material
Source: PubMed Central journal article supplement (PMC7850925)
Supplement: BLT-19-034_Supplementary_content.pdf [file BLT-19-034_Supplementary_content.pdf]

**ONLINE SUPPLEMENTARY CONTENT***Table S1 - Blood smear features in COVID-19 patients with anaemia and controls*

| Blood smear features       | COVID-19 patients with anaemia (Intensive Care Unit)<br>n=10 (4 F/6 M) | COVID-19 patients with anaemia (Sub Intensive Unit)<br>n=10 (8 F/2 M) | Non-COVID-19 patients (Intensive Care Unit)<br>n=5 (2 F/3 M) | Healthy blood donors<br>n=5 (3 F/2 M) |
|----------------------------|------------------------------------------------------------------------|-----------------------------------------------------------------------|--------------------------------------------------------------|---------------------------------------|
| Rouleaux formations        | 10/10 (100%)                                                           | 7/10 (70%)                                                            | None                                                         | None                                  |
| Red Cell autoagglutination | 7/10 (70%)                                                             | 4/10 (40%)                                                            | None                                                         | None                                  |
| Polychromasia              | 10/10 (100%)                                                           | 10/10 (100%)                                                          | None                                                         | None                                  |
| Basophilic stippling       | 9/10 (90%)                                                             | 8/10 (80%)                                                            | None                                                         | None                                  |
| Stomatocytes (≥5%)         | 7/10 (70%)                                                             | 5/10 (50%)                                                            | None                                                         | None                                  |
| Knizocytes (≥5%)           | 6/10 (60%)                                                             | 4/10 (40%)                                                            | None                                                         | None                                  |
| Cup-shaped cells           | 6/10 (60%)                                                             | 4/10 (40%)                                                            | None                                                         | None                                  |
| Spherocytes (≥2%)          | 4/10 (40%)                                                             | 3/10 (30%)                                                            | None                                                         | None                                  |
| Schistocytes (≥2%)         | 3/10 (30%)                                                             | 2/10 (20%)                                                            | None                                                         | None                                  |

The first column reports data from ten COVID-19 patients, admitted to the Intensive Care Unit and undergoing mechanical ventilation. Six (60%) were type A blood; four (40%) were DAT positive. The second column reports data from ten COVID-19 patients admitted into sub-intensive Care Units with mechanically assisted ventilation. Three (30%) were type A blood; seven (70%) were DAT positive. In the third and fourth column data from five non-COVID-19 patients admitted to the Intensive Care Unit with endotracheal intubation and from five healthy blood donors are respectively reported.  
F: female; M: male.

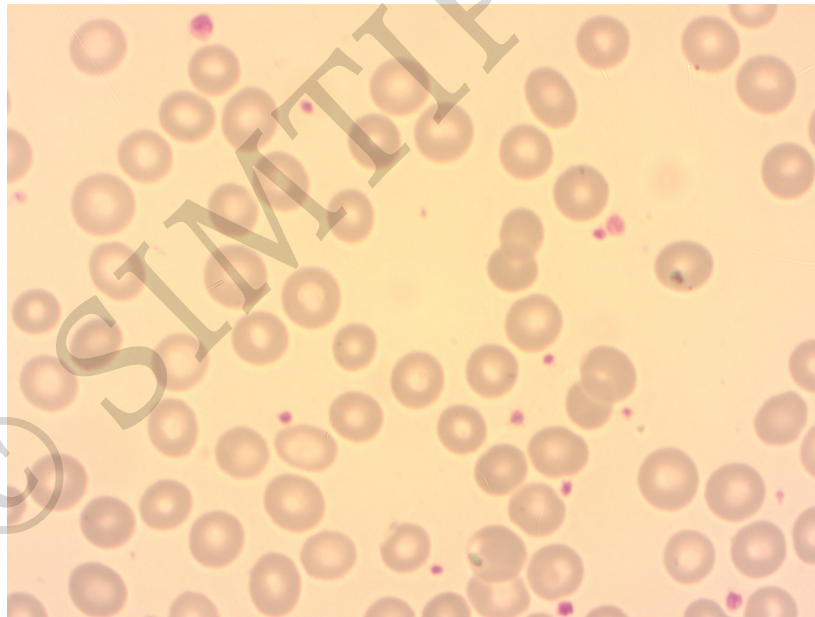

**Figure S1 - Blood smear features of a patient with COVID-19 related anaemia during hospitalisation, collected 32 days after hospital discharge**

Haemoglobin levels returned to normal (Hb 13.5 g/dL), and the blood smear showed unremarkable RBC morphology. The features of the same patient observed during hospitalisation are showed in **Figure 1**, Panel E.
